# Supplementary material for: The Brittleness and Chemical Stability of Optimized Geopolymer Composites
Source: MDPI journal article supplement (doi:10.3390/ma10040396), 2017-04-09
Supplement: s1 [file s1]

# Supplementary Materials: Brittleness and Chemical Stability of Optimized Geopolymer Composites

Michaela Steinerova, Lenka Matulova, Pavel Vermach and Jindrich Kotas

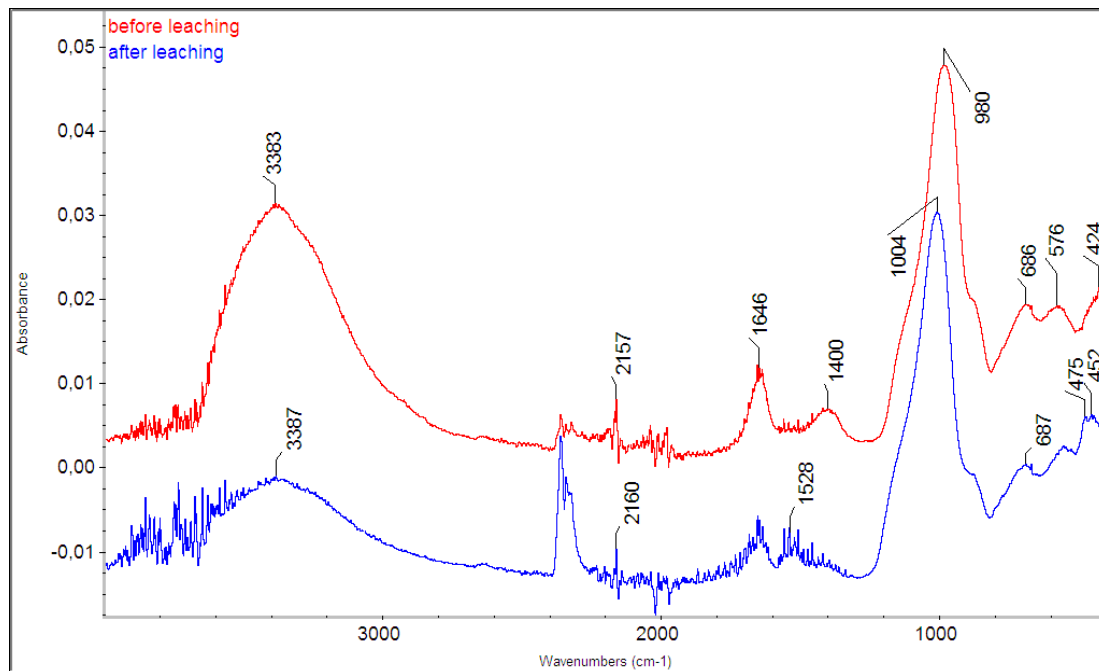

**Figure S1.** Fourier transform infrared (FTIR) spectra of geopolymer composite M60-5 with 5 wt % of glass fibers and 60 wt % of sand collected on the surface of the samples before and after leaching in acid water.

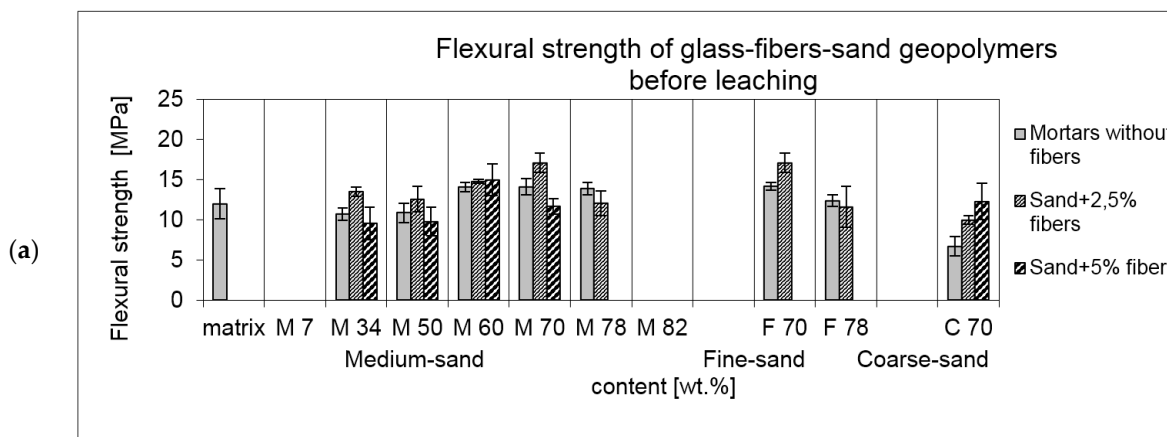

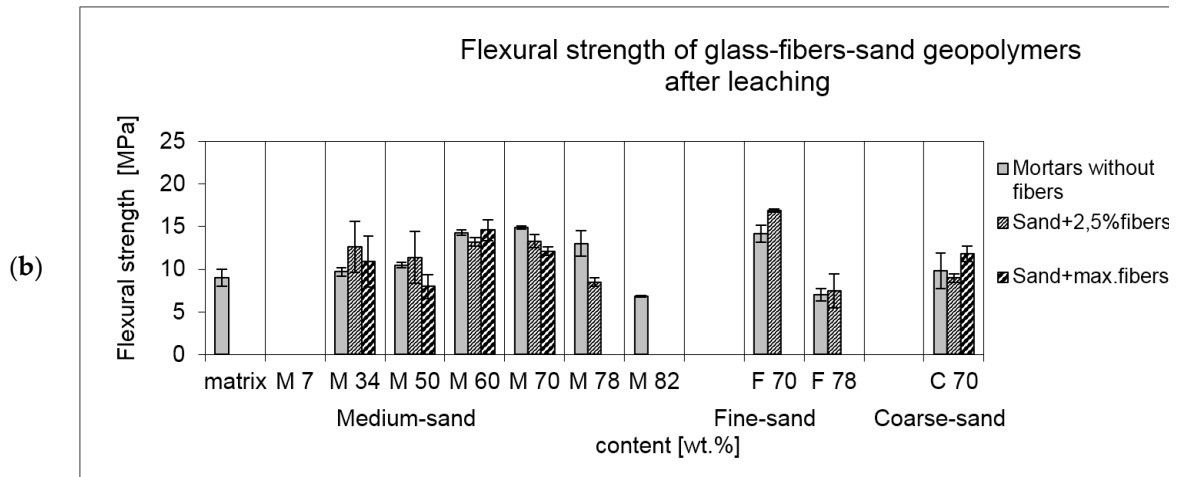

Figure S2. Flexural strength of glass-fibers-sand geopolymers before (a) and after (b) leaching.

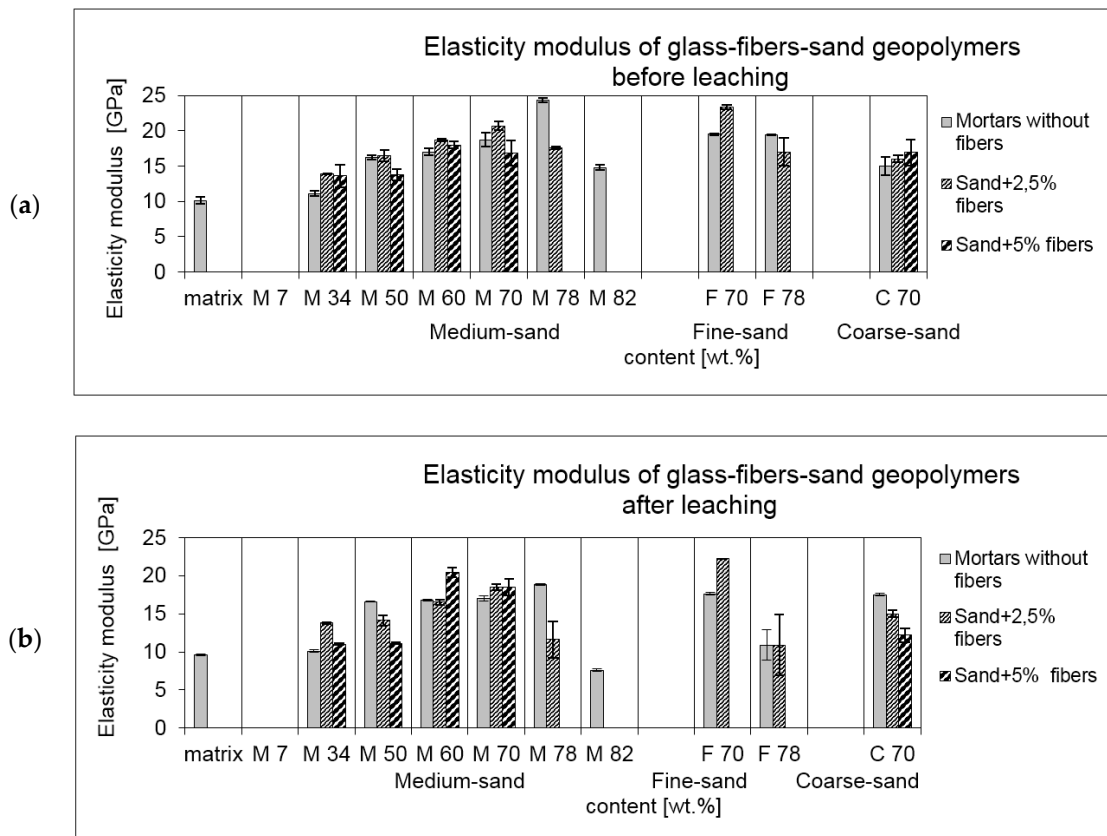

Figure S3. Elasticity modulus of glass-fibers-sand geopolymers before (a) and after (b) leaching.

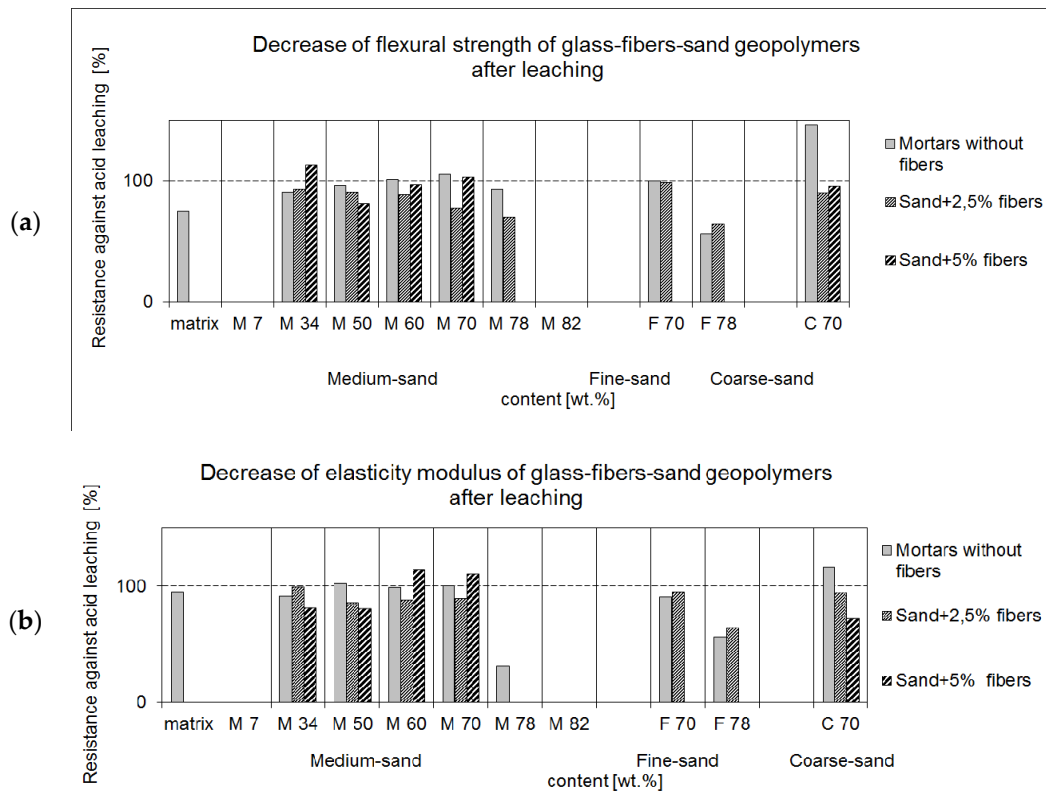

**Figure S4.** (a) Decrease of flexural strength of glass-fibers-sand geopolymers after leaching; (b) Decrease of elasticity modulus of glass-fibers-sand geopolymers after leaching.
